# Supplementary material for: UTP14A, DKC1, DDX10, PinX1, and ESF1 Modulate Cardiac Angiogenesis Leading to Obesity-Induced Cardiac Injury
Source: Hindawi journal article supplement (doi:10.1155/2022/2923291), 2022-06-13

Supplemental File 4 : Correlation between UTP14A, DKC1, DDX10, PinX1 and ESF1 expression and cardiac angiogenesis

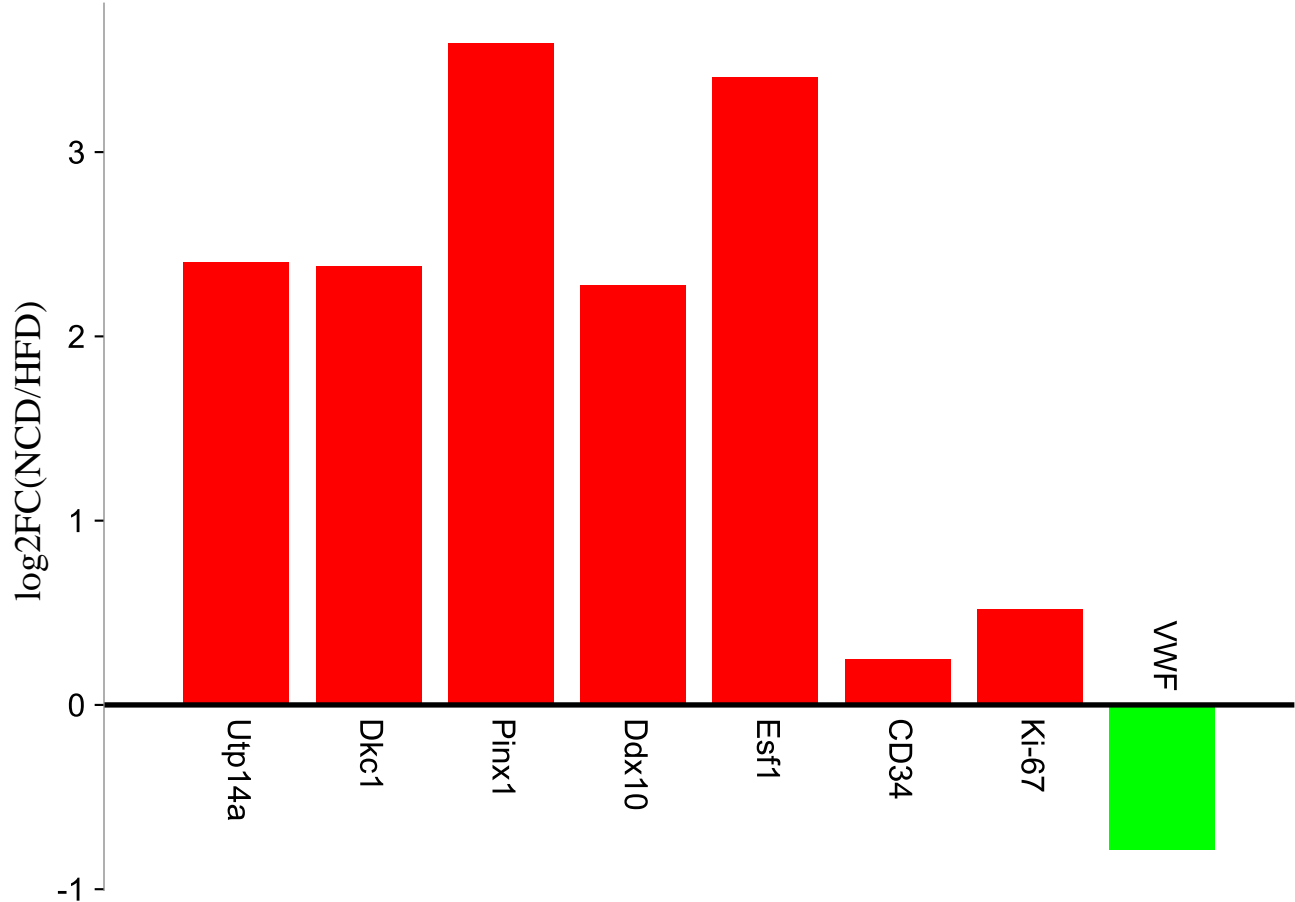

Supplement: f1 [file 2923291.f1.zip]
